# Supplementary material for: Multiple cytosolic DNA sensors bind plasmid DNA after transfection
Source: PubMed Central journal article supplement — Nucleic Acids Res. 2019 Sep 9;47(19):10235–46. doi: 10.1093/nar/gkz768 (PMC6821305; doi:10.1093/nar/gkz768), 2019-09-09

**Supplementary Figure 1. Putative DNA sensors and CREB protein are present in the cytosol of naïve C2C12 myoblasts.**

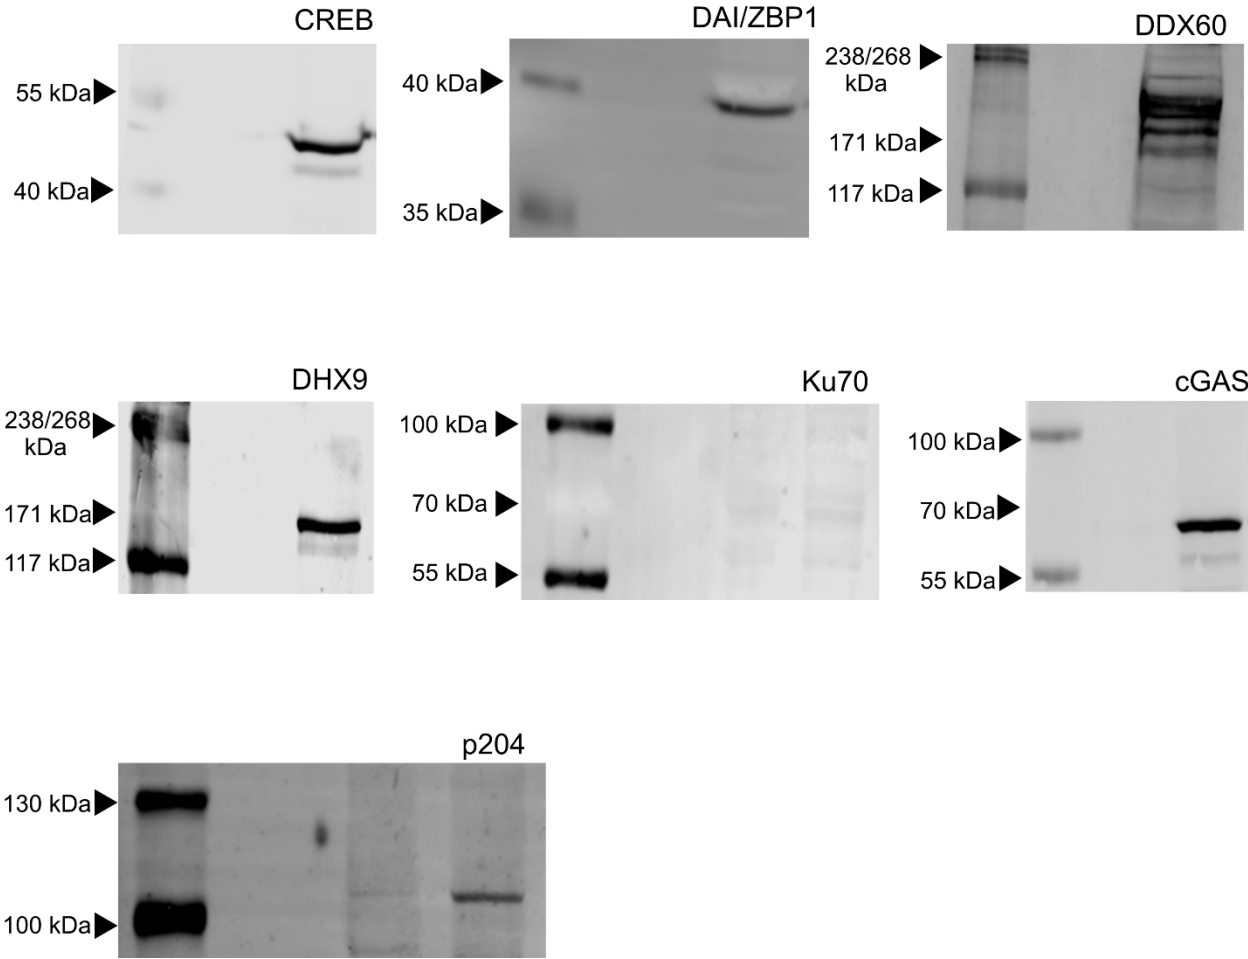

Supplement: gkz768_supplemental_file.pdf [file gkz768_supplemental_file.pdf]
